# Supplementary material
Source: MDPI journal article supplement (https://www.mdpi.com/2504-3129/3/2/11)
Supplement: s1 [file s1]

**Table S1.** Mean and cumulative soil NO<sub>3</sub>-N mineralization over six incubation periods and five free-thaw cycles with overall mean for corn, flax, pea, forage radish, soybean, spring wheat, and winter wheat crop residues and cycle means showing significant differences for the Foreman soil series in North Dakota.

| Cycle           | Crop Residue Treatment | Nitrogen mineralization, mg NO <sub>3</sub> kg <sup>-1</sup> soil |                         |                         |                         |                         |                         |            | Overall Average <sup>±</sup> | Cycle Average <sup>‡</sup> |
|-----------------|------------------------|-------------------------------------------------------------------|-------------------------|-------------------------|-------------------------|-------------------------|-------------------------|------------|------------------------------|----------------------------|
|                 |                        | 1 <sup>st</sup> (14 d.)                                           | 2 <sup>nd</sup> (28 d.) | 3 <sup>rd</sup> (42 d.) | 4 <sup>th</sup> (56 d.) | 5 <sup>th</sup> (70 d.) | 6 <sup>th</sup> (84 d.) | Cumulative |                              |                            |
| 1 <sup>st</sup> | Soil only              | 1.99b <sup>†</sup>                                                | 0.08a                   | 0.97ab                  | 2.92b                   | 2.29b                   | 2.39b                   | 10.6b      | 1.74b ± 2.21                 | 4.95b                      |
|                 | Corn                   | 3.67b                                                             | 0.02a                   | 0.01b                   | 0.07b                   | 0.00b                   | 0.02b                   | 3.77b      | 0.53b ± 1.40                 |                            |
|                 | Pea                    | 2.29b                                                             | 0.10a                   | 1.51ab                  | 2.84b                   | 2.25b                   | 2.55b                   | 11.5b      | 1.88b ± 1.67                 |                            |
|                 | Radish                 | 55.2a                                                             | 1.53a                   | 26.0a                   | 37.6a                   | 37.7a                   | 14.9a                   | 173a       | 28.3a ± 23.3                 |                            |
|                 | Soybean                | 2.30b                                                             | 0.06a                   | 0.01b                   | 0.22b                   | 0.22b                   | 0.15b                   | 2.96b      | 0.43b ± 0.85                 |                            |
|                 | Spring Wheat           | 3.20b                                                             | 0.02a                   | 0.01b                   | 0.10b                   | 0.10b                   | 0.08b                   | 3.50b      | 0.50b ± 1.21                 |                            |
|                 | Winter Wheat           | 2.28b                                                             | 0.01a                   | 0.01b                   | 0.09b                   | 0.00b                   | 0.06b                   | 2.43b      | 0.35b ± 0.87                 |                            |
| 2 <sup>nd</sup> | Soil only              | 0.95ab                                                            | 4.23bc                  | 3.60b                   | 1.81b                   | 4.05b                   | 4.66bc                  | 19.3b      | 3.21b ± 1.78                 | 9.03b                      |
|                 | Corn                   | 0.00b                                                             | 0.19c                   | 0.02b                   | 0.01b                   | 0.00b                   | 0.03c                   | 0.19b      | 0.03b ± 0.09                 |                            |
|                 | Pea                    | 0.36b                                                             | 11.4b                   | 9.65b                   | 7.77ab                  | 16.0ab                  | 13.7ab                  | 58.9b      | 9.79b ± 8.99                 |                            |
|                 | Radish                 | 14.1a                                                             | 143a                    | 68.5a                   | 26.8a                   | 25.8a                   | 21.4a                   | 300a       | 49.7a ± 47.9                 |                            |
|                 | Soybean                | 0.00b                                                             | 0.00c                   | 0.09b                   | 0.00b                   | 0.10b                   | 0.15c                   | 0.35b      | 0.06b ± 0.13                 |                            |
|                 | Spring Wheat           | 0.00b                                                             | 0.00c                   | 0.01b                   | 0.01b                   | 0.00b                   | 0.05c                   | 0.06b      | 0.01b ± 0.04                 |                            |
|                 | Winter Wheat           | 0.00b                                                             | 0.04c                   | 0.01b                   | 0.01a                   | 0.00b                   | 0.02c                   | 0.05b      | 0.01b ± 0.03                 |                            |
| 3 <sup>rd</sup> | Soil only              | 2.58b                                                             | 3.13b                   | 3.13b                   | 3.26b                   | 3.44b                   | 3.19b                   | 18.7b      | 2.99b ± 0.89                 | 10.22b                     |
|                 | Corn                   | 0.00b                                                             | 0.00b                   | 0.00b                   | 0.00b                   | 0.01b                   | 0.01b                   | 0.01b      | 0.01b ± 0.01                 |                            |
|                 | Pea                    | 21.7b                                                             | 18.9b                   | 18.9b                   | 14.6b                   | 19.2a                   | 22.0a                   | 115ab      | 20.7ab ± 8.70                |                            |
|                 | Radish                 | 110a                                                              | 52.5a                   | 52.5a                   | 33.7a                   | 23.3a                   | 21.9a                   | 295a       | 59.0a ± 36.1                 |                            |
|                 | Soybean                | 0.00b                                                             | 0.00b                   | 0.00b                   | 0.03b                   | 0.00b                   | 0.01b                   | 0.04b      | 0.00b ± 0.02                 |                            |
|                 | Spring Wheat           | 0.07b                                                             | 0.00b                   | 0.00b                   | 0.00b                   | 0.01b                   | 0.02b                   | 0.09b      | 0.03b ± 0.04                 |                            |
|                 | Winter Wheat           | 0.00b                                                             | 0.00b                   | 0.00b                   | 0.00b                   | 0.00b                   | 0.11b                   | 0.12b      | 0.04b ± 0.05                 |                            |
| 4 <sup>th</sup> | Soil only              | 6.55a                                                             | 17.5ab                  | 33.3ab                  | 24.1b                   | 32.6b                   | 32.8ab                  | 147ab      | 22.7ab ± 11.8                | 17.84a                     |
|                 | Corn                   | 0.19b                                                             | 0.35b                   | 5.32b                   | 1.83b                   | 0.48c                   | 0.49b                   | 8.66b      | 1.03b ± 2.87                 |                            |
|                 | Pea                    | 4.19ab                                                            | 19.8ab                  | 28.3ab                  | 46.1ab                  | 54.7ab                  | 45.6a                   | 198ab      | 30.1ab ± 21.7                |                            |
|                 | Radish                 | 8.42a                                                             | 60.4a                   | 78.4a                   | 88.6a                   | 76.3a                   | 65.2a                   | 377a       | 53.2a ± 40.9                 |                            |
|                 | Soybean                | 0.00b                                                             | 0.93b                   | 2.12b                   | 1.19b                   | 0.87c                   | 0.70b                   | 5.80b      | 0.74b ± 1.05                 |                            |
|                 | Spring Wheat           | 0.43b                                                             | 0.57b                   | 0.83b                   | 2.39b                   | 0.59c                   | 0.33b                   | 5.15b      | 0.68b ± 1.39                 |                            |
|                 | Winter Wheat           | 0.00b                                                             | 0.72b                   | 1.49b                   | 3.06b                   | 0.62c                   | 1.00b                   | 6.89b      | 0.91b ± 1.46                 |                            |
| 5 <sup>th</sup> | Soil only              | 26.5a                                                             | 31.0a                   | 28.5b                   | 27.5bc                  | 8.19bc                  | 0.00b                   | 121ab      | 18.4ab ± 12.9                | 16.03a                     |
|                 | Corn                   | 0.79b                                                             | 0.87a                   | 7.51b                   | 5.31c                   | 1.04cd                  | 0.00b                   | 15.5b      | 2.02b ± 3.32                 |                            |
|                 | Pea                    | 40.7a                                                             | 56.5a                   | 51.1ab                  | 53.3ab                  | 9.69b                   | 0.00b                   | 211ab      | 31.4ab ± 25.1                |                            |
|                 | Radish                 | 26.2a                                                             | 44.8a                   | 98.0a                   | 86.8a                   | 25.4a                   | 7.31a                   | 288a       | 39.9a ± 45.5                 |                            |
|                 | Soybean                | 0.00b                                                             | 1.53a                   | 6.14b                   | 2.84c                   | 0.06d                   | 0.00b                   | 10.6b      | 1.30b ± 2.38                 |                            |
|                 | Spring Wheat           | 0.78b                                                             | 0.81a                   | 4.59b                   | 5.54c                   | 0.47cd                  | 0.00b                   | 12.2b      | 1.61b ± 3.52                 |                            |
|                 | Winter Wheat           | 0.01a                                                             | 1.00a                   | 6.30b                   | 5.43c                   | 0.73cd                  | 0.00b                   | 13.5b      | 1.66b ± 3.07                 |                            |

<sup>†</sup>Different letters within a column for each incubation cycle are significantly different at the 0.05 level using Tukey's HSD test.

<sup>±</sup>Nitrogen mineralization mean over all incubation periods for each crop residue treatment.

<sup>‡</sup>Nitrogen mineralization mean over all incubation periods including all crop residue treatments illustrating system changes over time.
